# Supplementary material
Source: PubMed Central journal article supplement (PMC9060567)
Supplement: NIHMS1796648-supplement-Supplementary_appendices.pdf [file NIHMS1796648-supplement-Supplementary_appendices.pdf]

## SUPPLEMENT TO “BIDIMENSIONAL LINKED MATRIX FACTORIZATION FOR PAN-OMICS PAN-CANCER ANALYSIS”

BY ERIC F. LOCK<sup>1</sup>, JUN YOUNG PARK<sup>2</sup> AND KATHERINE A. HOADLEY<sup>3</sup>

<sup>1</sup>*Division of Biostatistics, School of Public Health, University of Minnesota, [elock@umn.edu](mailto:elock@umn.edu)*

<sup>2</sup>*Department of Statistical Sciences, Faculty of Arts & Science, University of Toronto, [junjy.park@utoronto.ca](mailto:junjy.park@utoronto.ca)*

<sup>3</sup>*Department of Genetics, Computational Medicine Program, University of North Carolina, [hoadley@med.unc.edu](mailto:hoadley@med.unc.edu)*

### APPENDIX A: MODULE ENUMERATION

As the default representation of model (6) in the main article, set  $K = (2^I - 1)(2^J - 1)$  and let  $\mathbf{R}$  and  $\mathbf{C}$  enumerate all possible modules as follows. For  $k = 1, \dots, K$ , let  $\mathbf{R}[\cdot, k]$  be the  $I$ -digit binary representation for  $k \bmod (2^I - 1) + 1$ , where  $\bmod$  gives the modulo (remainder) operator. For  $k = 1, \dots, K$ , let  $\mathbf{C}[\cdot, k]$  give the  $J$ -digit binary representation for  $\lceil k / (2^I - 1) \rceil$ , where  $\lceil \cdot \rceil$  gives the ceiling operator.

### APPENDIX B: PROOFS

#### B.1. Proof of Proposition 1.

PROOF. Let  $\{\hat{\mathbf{S}}_{\cdot\cdot}^{(k)}\}_{k=1}^K \in \mathbb{S}_{\hat{\mathbf{X}}}$  be a minimizer of the objective function  $f(\cdot)$ . Assume a violation of condition 1., wherein  $\lambda_{k'} \geq \lambda_k$ . Consider another minimizer  $\{\tilde{\mathbf{S}}_{\cdot\cdot}^{(k)}\}_{k=1}^K$ , where  $\tilde{\mathbf{S}}_{\cdot\cdot}^{(k)} = \mathbf{0}$  and  $\tilde{\mathbf{S}}_{\cdot\cdot}^{(k')} = \hat{\mathbf{S}}_{\cdot\cdot}^{(k)} + \hat{\mathbf{S}}_{\cdot\cdot}^{(k')}$ , and all other modules are equal. Then, using the triangle inequality,

$$\begin{aligned} f(\{\hat{\mathbf{S}}_{\cdot\cdot}^{(k)}\}_{k=1}^K) - f(\{\tilde{\mathbf{S}}_{\cdot\cdot}^{(k)}\}_{k=1}^K) &= \lambda_k \|\hat{\mathbf{S}}_{\cdot\cdot}^{(k)}\|_* + \lambda_{k'} \|\hat{\mathbf{S}}_{\cdot\cdot}^{(k')}\|_* - \lambda_k \|\hat{\mathbf{S}}_{\cdot\cdot}^{(k)} + \hat{\mathbf{S}}_{\cdot\cdot}^{(k')}\|_* \\ &\geq \lambda_k \|\hat{\mathbf{S}}_{\cdot\cdot}^{(k)}\|_* + \lambda_{k'} \|\hat{\mathbf{S}}_{\cdot\cdot}^{(k')}\|_* - \lambda_k (\|\hat{\mathbf{S}}_{\cdot\cdot}^{(k)}\|_* + \|\hat{\mathbf{S}}_{\cdot\cdot}^{(k')}\|_*) \\ &\geq \lambda_k \|\hat{\mathbf{S}}_{\cdot\cdot}^{(k)}\|_* + \lambda_{k'} \|\hat{\mathbf{S}}_{\cdot\cdot}^{(k')}\|_* - \lambda_k (\|\hat{\mathbf{S}}_{\cdot\cdot}^{(k)}\|_*) - \lambda_{k'} \|\hat{\mathbf{S}}_{\cdot\cdot}^{(k')}\|_* \\ &= 0, \end{aligned}$$

and thus there is a solution in which module  $k$  is  $\mathbf{0}$ , regardless of the data  $\mathbf{X}_{\cdot\cdot}$ .

Now assume a violation of condition 2., wherein  $\lambda_k \geq \sum_{j \in \mathcal{I}_k} \lambda_j$ . Let  $\hat{\mathbf{S}}^{(k)} = \sum_{j \in \mathcal{I}_k} \hat{\mathbf{S}}_{\cdot\cdot}^{j'}$ , where  $\hat{\mathbf{S}}_{\cdot\cdot}^{j'}$  contains the submatrix of  $\hat{\mathbf{S}}_{\cdot\cdot}^{(k)}$  corresponding to  $\mathbf{R}[\cdot, j]$  and  $\mathbf{C}[\cdot, j]$  and  $\mathbf{0}$  otherwise. Consider another decomposition  $\{\tilde{\mathbf{S}}_{\cdot\cdot}^{(k)}\}_{k=1}^K$ , where  $\tilde{\mathbf{S}}_{\cdot\cdot}^{(k)} = \mathbf{0}$  and  $\tilde{\mathbf{S}}_{\cdot\cdot}^{(j)} = \hat{\mathbf{S}}_{\cdot\cdot}^{(j)} + \hat{\mathbf{S}}_{\cdot\cdot}^{(j)'}$  for all  $j \in \mathcal{I}_k$ . Then,

$$\begin{aligned} f(\{\hat{\mathbf{S}}_{\cdot\cdot}^{(k)}\}_{k=1}^K) - f(\{\tilde{\mathbf{S}}_{\cdot\cdot}^{(k)}\}_{k=1}^K) &= \lambda_k \|\hat{\mathbf{S}}_{\cdot\cdot}^{(k)}\|_* + \sum_{j \in \mathcal{I}_k} \lambda_j \|\hat{\mathbf{S}}_{\cdot\cdot}^{(j)}\|_* - \sum_{j \in \mathcal{I}_k} \lambda_j \|\hat{\mathbf{S}}_{\cdot\cdot}^{(j)} + \hat{\mathbf{S}}_{\cdot\cdot}^{(j)'}\|_* \\ &\geq \lambda_k \|\hat{\mathbf{S}}_{\cdot\cdot}^{(k)}\|_* + \sum_{j \in \mathcal{I}_k} \lambda_j \|\hat{\mathbf{S}}_{\cdot\cdot}^{(j)}\|_* - \sum_{j \in \mathcal{I}_k} \lambda_j \|\hat{\mathbf{S}}_{\cdot\cdot}^{(j)}\|_* - \sum_{j \in \mathcal{I}_k} \lambda_j \|\hat{\mathbf{S}}_{\cdot\cdot}^{(j)'}\|_* \\ &= \lambda_k \|\hat{\mathbf{S}}_{\cdot\cdot}^{(k)}\|_* - \sum_{j \in \mathcal{I}_k} \lambda_j \|\hat{\mathbf{S}}_{\cdot\cdot}^{(j)'}\|_* \\ &\geq \lambda_k \|\hat{\mathbf{S}}_{\cdot\cdot}^{(k)}\|_* - \sum_{j \in \mathcal{I}_k} \lambda_j \|\hat{\mathbf{S}}_{\cdot\cdot}^{(k)}\|_* \\ &\geq 0, \end{aligned}$$

and thus there is a solution in which module  $k$  is 0, regardless of the data  $\mathbf{X}$ .  $\square$

### B.2. Proof of Proposition 4.

PROOF. We show that  $\lambda_k = \sqrt{\mathbf{R}[\cdot, k] \cdot \mathbf{M}} + \sqrt{\mathbf{C}[\cdot, k] \cdot \mathbf{N}}$  satisfies the necessary conditions of Proposition ???. For condition 1., note that  $\sqrt{\mathbf{R}[\cdot, k] \cdot \mathbf{M}} + \sqrt{\mathbf{C}[\cdot, k] \cdot \mathbf{N}} > \sqrt{\mathbf{R}[\cdot, j] \cdot \mathbf{M}} + \sqrt{\mathbf{C}[\cdot, j] \cdot \mathbf{N}}$ .

For condition 2., note that

$$\begin{aligned} \sum_{j \in \mathcal{I}_k} \sqrt{\mathbf{R}[\cdot, j] \cdot \mathbf{M}} + \sqrt{\mathbf{C}[\cdot, j] \cdot \mathbf{N}} &\geq \sqrt{\sum_{j \in \mathcal{I}_k} \mathbf{R}[\cdot, j] \cdot \mathbf{M}} + \sqrt{\sum_{j \in \mathcal{I}_k} \mathbf{C}[\cdot, j] \cdot \mathbf{N}} \\ &= \sqrt{r \cdot \mathbf{R}[\cdot, k] \cdot \mathbf{M}} + \sqrt{c \cdot \mathbf{C}[\cdot, k] \cdot \mathbf{N}} \\ &> \sqrt{\mathbf{R}[\cdot, k] \cdot \mathbf{M}} + \sqrt{\mathbf{C}[\cdot, k] \cdot \mathbf{N}} \end{aligned}$$

$\square$

**B.3. Proof of Proposition 5.** Lemmas 1 and 2 below are used to establish Proposition 5.

LEMMA 1. *Take two decompositions  $\{\hat{\mathbf{S}}_{\cdot\cdot}^{(k)}\}_{k=1}^K \in \mathbb{S}_{\hat{\mathbf{X}}}$  and  $\{\tilde{\mathbf{S}}_{\cdot\cdot}^{(k)}\}_{k=1}^K \in \mathbb{S}_{\tilde{\mathbf{X}}}$ , and assume that both minimize the structured nuclear norm penalty:*

$$f_{\text{pen}}(\{\hat{\mathbf{S}}_{\cdot\cdot}^{(k)}\}_{k=1}^K) = f_{\text{pen}}(\{\tilde{\mathbf{S}}_{\cdot\cdot}^{(k)}\}_{k=1}^K) = \min_{\mathbb{S}_{\tilde{\mathbf{X}}}} f_{\text{pen}}(\{\mathbf{S}_{\cdot\cdot}^{(k)}\}_{k=1}^K).$$

Then, for any  $\alpha \in [0, 1]$ ,

$$\|\alpha \hat{\mathbf{S}}_{\cdot\cdot}^{(k)} + (1 - \alpha) \tilde{\mathbf{S}}_{\cdot\cdot}^{(k)}\|_* = \alpha \|\hat{\mathbf{S}}_{\cdot\cdot}^{(k)}\|_* + (1 - \alpha) \|\tilde{\mathbf{S}}_{\cdot\cdot}^{(k)}\|_*$$

for  $k = 1, \dots, K$ .

PROOF. Because  $\mathbb{S}_{\tilde{\mathbf{X}}}$  is a convex space and  $f_{\text{pen}}$  is a convex function, the set of minimizers of  $f_{\text{pen}}$  over  $\mathbb{S}_{\tilde{\mathbf{X}}}$  is also convex. Thus,

$$f_{\text{pen}}(\{\alpha \hat{\mathbf{S}}_{\cdot\cdot}^{(k)} + (1 - \alpha) \tilde{\mathbf{S}}_{\cdot\cdot}^{(k)}\}_{k=1}^K) = \min_{\mathbb{S}_{\tilde{\mathbf{X}}}} f_{\text{pen}}(\{\mathbf{S}_{\cdot\cdot}^{(k)}\}_{k=1}^K).$$

The result follows from the convex property of the nuclear norm operator, which implies that for any two matrices of equal size  $\hat{\mathbf{A}}$  and  $\tilde{\mathbf{A}}$ ,

$$(1) \quad \|\alpha \hat{\mathbf{A}} + (1 - \alpha) \tilde{\mathbf{A}}\|_* \leq \alpha \|\hat{\mathbf{A}}\|_* + (1 - \alpha) \|\tilde{\mathbf{A}}\|_*.$$

Applying (1) to each additive term in  $f_{\text{pen}}$  gives

$$\begin{aligned} (2) \quad f_{\text{pen}}(\{\alpha \hat{\mathbf{S}}_{\cdot\cdot}^{(k)} + (1 - \alpha) \tilde{\mathbf{S}}_{\cdot\cdot}^{(k)}\}_{k=1}^K) &\leq \alpha f_{\text{pen}}(\{\hat{\mathbf{S}}_{\cdot\cdot}^{(k)}\}_{k=1}^K) + (1 - \alpha) f_{\text{pen}}(\{\tilde{\mathbf{S}}_{\cdot\cdot}^{(k)}\}_{k=1}^K) \\ &= \min_{\mathbb{S}_{\tilde{\mathbf{X}}}} f_{\text{pen}}(\{\mathbf{S}_{\cdot\cdot}^{(k)}\}_{k=1}^K). \end{aligned}$$

Because  $\{\alpha \hat{\mathbf{S}}_{\cdot\cdot}^{(k)} + (1 - \alpha) \tilde{\mathbf{S}}_{\cdot\cdot}^{(k)}\}_{k=1}^K \in \mathbb{S}_{\tilde{\mathbf{X}}}$ , the inequality in (2) must be an equality, and it follows that the inequality (1) must be an equality for each penalized term in the decomposition.  $\square$

LEMMA 2. *Take two matrices  $\hat{\mathbf{A}}$  and  $\tilde{\mathbf{A}}$ . If  $\|\hat{\mathbf{A}} + \tilde{\mathbf{A}}\|_* = \|\hat{\mathbf{A}}\|_* + \|\tilde{\mathbf{A}}\|_*$ , and  $\mathbf{U}\mathbf{D}_+ \mathbf{V}^T$  is the SVD of  $\hat{\mathbf{A}} + \tilde{\mathbf{A}}$ , then  $\hat{\mathbf{A}} = \hat{\mathbf{U}}\hat{\mathbf{D}}\hat{\mathbf{V}}^T$  where  $\hat{\mathbf{D}}$  is diagonal and  $\|\hat{\mathbf{A}}\|_* = \|\hat{\mathbf{D}}\|_*$ , and  $\tilde{\mathbf{A}} = \tilde{\mathbf{U}}\tilde{\mathbf{D}}\tilde{\mathbf{V}}^T$  where  $\tilde{\mathbf{D}}$  is diagonal and  $\|\tilde{\mathbf{A}}\|_* = \|\tilde{\mathbf{D}}\|_*$ .*

PROOF. Here we use the fact that the spectral norm is dual to the nuclear norm (Fazel et al., 2001). That is, if  $\sigma_1(\mathbf{Z})$  is the maximum singular value of  $\mathbf{Z}$  (i.e., the spectral norm), then

$$\|\mathbf{A}\|_* = \sup_{\sigma_1(\mathbf{Z})=1} \langle \mathbf{Z}, \mathbf{A} \rangle.$$

Thus,

$$(3) \quad \sup_{\sigma_1(\mathbf{Z})=1} \langle \mathbf{Z}, \hat{\mathbf{A}} + \tilde{\mathbf{A}} \rangle = \sup_{\sigma_1(\mathbf{Z})=1} \langle \mathbf{Z}, \hat{\mathbf{A}} \rangle + \sup_{\sigma_1(\mathbf{Z})=1} \langle \mathbf{Z}, \tilde{\mathbf{A}} \rangle.$$

By the properties of the SVD,

$$(4) \quad \langle \mathbf{UV}^T, \tilde{\mathbf{A}} \rangle + \langle \mathbf{UV}^T, \hat{\mathbf{A}} \rangle = \langle \mathbf{UV}^T, \hat{\mathbf{A}} + \tilde{\mathbf{A}} \rangle = \sup_{\sigma_1(\mathbf{Z})=1} \langle \mathbf{Z}, \hat{\mathbf{A}} + \tilde{\mathbf{A}} \rangle.$$

By (3) and (4),

$$(5) \quad \langle \mathbf{UV}^T, \tilde{\mathbf{A}} \rangle + \langle \mathbf{UV}^T, \hat{\mathbf{A}} \rangle = \sup_{\sigma_1(\mathbf{Z})=1} \langle \mathbf{Z}, \hat{\mathbf{A}} \rangle + \sup_{\sigma_1(\mathbf{Z})=1} \langle \mathbf{Z}, \tilde{\mathbf{A}} \rangle.$$

Because  $\mathbf{UV}^T \in \{\mathbf{Z} : \sigma_1(\mathbf{Z}) = 1\}$  it follows that

$$\langle \mathbf{UV}^T, \hat{\mathbf{A}} \rangle \leq \sup_{\sigma_1(\mathbf{Z})=1} \langle \mathbf{Z}, \hat{\mathbf{A}} \rangle \text{ and } \langle \mathbf{UV}^T, \tilde{\mathbf{A}} \rangle \leq \sup_{\sigma_1(\mathbf{Z})=1} \langle \mathbf{Z}, \tilde{\mathbf{A}} \rangle,$$

and so (5) implies

$$\langle \mathbf{UV}^T, \hat{\mathbf{A}} \rangle = \sup_{\sigma_1(\mathbf{Z})=1} \langle \mathbf{Z}, \hat{\mathbf{A}} \rangle = \|\hat{\mathbf{A}}\|_*,$$

and similarly  $\langle \mathbf{UV}^T, \tilde{\mathbf{A}} \rangle = \|\tilde{\mathbf{A}}\|_*$ .

Let  $\tilde{\mathbf{U}}\tilde{\mathbf{D}}\tilde{\mathbf{V}}^T$  give the SVD of  $\tilde{\mathbf{A}}$ . Note that

$$\langle \mathbf{UV}^T, \tilde{\mathbf{U}}\tilde{\mathbf{D}}\tilde{\mathbf{V}}^T \rangle = \text{Tr}(\mathbf{V}\mathbf{U}^T\tilde{\mathbf{U}}\tilde{\mathbf{D}}\tilde{\mathbf{V}}^T) = \text{Tr}(\mathbf{V}^T\tilde{\mathbf{V}}\mathbf{U}^T\tilde{\mathbf{U}}\tilde{\mathbf{D}}),$$

and

$$\text{Tr}(\mathbf{V}^T\tilde{\mathbf{V}}\mathbf{U}^T\tilde{\mathbf{U}}\tilde{\mathbf{D}}) = \|\tilde{\mathbf{A}}\|_* = \sum_i \tilde{\mathbf{D}}[i, i]$$

if and only if  $\mathbf{V}^T\tilde{\mathbf{V}}\mathbf{U}^T\tilde{\mathbf{U}}[i, i] = 1$  where  $\tilde{\mathbf{D}}[i, i] > 0$ . It follows that the left and right singular vectors of  $\tilde{\mathbf{A}}$  that correspond to non-zero singular values must also be singular vectors of  $\hat{\mathbf{A}} + \tilde{\mathbf{A}}$ . By an analogous argument, the left and right singular vectors that correspond to non-zero singular values in  $\hat{\mathbf{A}}$  must also be singular vectors of  $\hat{\mathbf{A}} + \tilde{\mathbf{A}}$ .  $\square$

Proposition 5 is a direct corollary of Lemmas 1 and 2, as Lemma 1 implies  $\|\hat{\mathbf{S}}_{\cdot\cdot}^{(k)} + \tilde{\mathbf{S}}_{\cdot\cdot}^{(k)}\|_* = \|\hat{\mathbf{S}}_{\cdot\cdot}^{(k)}\|_* + \|\tilde{\mathbf{S}}_{\cdot\cdot}^{(k)}\|_*$  for each  $k$ , and then Lemma 2 implies the result.

#### B.4. Proof of Theorem 1.

PROOF. Take two decomposition  $\{\hat{\mathbf{S}}_{\cdot\cdot}^{(k)}\}_{k=1}^K$  and  $\{\tilde{\mathbf{S}}_{\cdot\cdot}^{(k)}\}_{k=1}^K$  that satisfy properties 1., 2., and 3. of Theorem 1; we will show that  $\{\hat{\mathbf{S}}_{\cdot\cdot}^{(k)}\}_{k=1}^K = \{\tilde{\mathbf{S}}_{\cdot\cdot}^{(k)}\}_{k=1}^K$ . For each  $k = 1, \dots, K$ , write  $\hat{\mathbf{S}}_{\cdot\cdot}^{(k)} = \mathbf{U}^{(k)}\hat{\mathbf{D}}\mathbf{V}^{(k)T}$  and  $\tilde{\mathbf{S}}_{\cdot\cdot}^{(k)} = \mathbf{U}^{(k)}\tilde{\mathbf{D}}^{(k)}\mathbf{V}^{(k)T}$  as in Proposition ???. Then, it suffices to show that  $\hat{\mathbf{D}}^{(k)}[r, r] = \tilde{\mathbf{D}}^{(k)}[r, r]$  for all  $k, r$ .

First, consider module  $k = 1$  with  $\mathbf{R}[\cdot, 1] = [1 \ 0 \ \dots \ 0]^T$  and  $\mathbf{C}[\cdot, 1] = [1 \ 0 \ \dots \ 0]^T$ . By way of contradiction, assume  $\hat{\mathbf{D}}^{(1)}[1, 1] > 0$  and  $\tilde{\mathbf{D}}^{(1)}[1, 1] = 0$ . The linear independence of  $\{\mathbf{V}_j^{(k)}[\cdot, r] : \hat{\mathbf{D}}^{(k)}[r, r] > 0\}$  and  $\{\mathbf{V}_j^{(k)}[\cdot, r] : \tilde{\mathbf{D}}^{(k)}[r, r] > 0\}$  implies that

$$\text{row}(\mathbf{X}_{\cdot\cdot}) = \text{span}\{\mathbf{U}^{(k)}[\cdot, r] : \hat{\mathbf{D}}^{(k)}[r, r] > 0\} = \text{span}\{\mathbf{U}^{(k)}[\cdot, r] : \tilde{\mathbf{D}}^{(k)}[r, r] > 0\}.$$

Thus,  $\mathbf{U}^{(1)}[\cdot, 1] \in \text{span}\{\{\mathbf{U}_i^{(k)}[\cdot, r] : \tilde{\mathbf{D}}^{(k)}[r, r] > 0\},$  and it follows from the orthogonality of  $\mathbf{U}^{(1)}[\cdot, 1]$  and  $\{\mathbf{U}^{(1)}[\cdot, r], r > 1\}$  that

$$\mathbf{U}_i^{(1)}[\cdot, 1] \in \text{span}\{\{\mathbf{U}_i^{(k)}[\cdot, r] : \tilde{\mathbf{D}}^{(k)}[r, r] > 0 \text{ and } k > 1\}.$$

Moreover, because  $\mathbf{U}_i^{(1)} = \mathbf{0}$  for any  $i > 1$  and  $\{\mathbf{U}_i^{(k)}[\cdot, r] : \tilde{\mathbf{D}}^{(k)}[r, r] > 0\}$  are linearly independent it follows that

$$(6) \quad \mathbf{U}_i^{(1)}[\cdot, 1] \in \text{span}\{\mathbf{U}_i^{(k)}[\cdot, r] : \tilde{\mathbf{D}}^{(k)}[r, r] > 0, k > 1, \text{ and } \mathbf{R}[i, k] = 0 \text{ for any } i > 1\}.$$

Note that (6) implies  $\mathbf{U}_1^{(1)}[\cdot, 1] \in \text{row}(\mathbf{X}_{12} + \dots + \text{row}(\mathbf{X}_{1J}))$ , however, this is contradicted by the linear independence of  $\mathbf{U}_1^{(1)}[\cdot, 1]$  and  $\{\mathbf{U}_i^{(k)}[\cdot, r] : \hat{\mathbf{D}}^{(k)}[r, r] > 0, k > 1\}$ . Thus, we conclude that  $\tilde{\mathbf{D}}^{(1)}[1, 1] > 0$  implies  $\hat{\mathbf{D}}^{(1)}[1, 1] > 0$ . Analogous arguments show that  $\tilde{\mathbf{D}}^{(k)}[r, r] > 0$  if and only if  $\hat{\mathbf{D}}^{(k)}[r, r] > 0$  for any pair  $(r, k)$ . It follows that  $\{\mathbf{U}_i^{(k)}[\cdot, r] : \hat{\mathbf{D}}^{(k)}[r, r] > 0 \text{ or } \tilde{\mathbf{D}}^{(k)}[r, r] > 0\}$  are linearly independent for  $i = 1, \dots, I$ , and  $\{\mathbf{V}_j^{(k)}[\cdot, r] : \hat{\mathbf{D}}^{(k)}[r, r] > 0 \text{ or } \tilde{\mathbf{D}}^{(k)}[r, r] > 0\}$  are linearly independent for  $j = 1, \dots, J$ . Thus,

$$\sum_{k=1}^K \mathbf{U}_i^{(k)}(\hat{\mathbf{D}}^{(k)} - \tilde{\mathbf{D}}^{(k)})\mathbf{V}_j^{(k)T} = \sum_{k=1}^K \hat{\mathbf{S}}_{ij}^{(k)} - \tilde{\mathbf{S}}_{ij}^{(k)} = \mathbf{X}_{ij} - \mathbf{X}_{ij} = \mathbf{0}$$

implies that  $\hat{\mathbf{D}}^{(k)}[r, r] = \tilde{\mathbf{D}}^{(k)}[r, r]$  for all  $k, r$ .

□

## REFERENCES

- Fazel, M., Hindi, H., Boyd, S. P., et al. (2001). A rank minimization heuristic with application to minimum order system approximation. In *Proceedings of the American control conference*, volume 6, pages 4734–4739. Citeseer.
